# Supplementary material for: Bentonite as a Functional Material Enhancing Phytostabilization of Post-Industrial Contaminated Soils with Heavy Metals
Source: MDPI journal article supplement (doi:10.3390/ma15238331), 2022-11-23
Supplement: s1 [file s1]

**Table S1.** ANOVA for HMs in soil, above-ground parts and roots of plants

| <b>Soil after phytostabilization</b> |                                 |                                 |                                   |                                   |             |          |           |
|--------------------------------------|---------------------------------|---------------------------------|-----------------------------------|-----------------------------------|-------------|----------|-----------|
|                                      | <b>Locality 1<br/>(control)</b> | <b>Locality 2<br/>(control)</b> | <b>Locality 3<br/>(bentonite)</b> | <b>Locality 4<br/>(bentonite)</b> | <b>d.f.</b> | <b>F</b> | <b>p</b>  |
| Mean Cu (mg/kg)                      | 306.4                           | 392.1                           | 231.3                             | 301.1                             | 1,2         | 2.26     | 0.28      |
| Mean Ni (mg/kg)                      | 110.7                           | 111.9                           | 85.5                              | 92.4                              | 1,2         | 41.26    | 0.02*     |
| Mean Cd (mg/kg)                      | 10.8                            | 10.8                            | 7.8                               | 8.8                               | 1,2         | 24.70    | 0.04*     |
| Mean Pb (mg/kg)                      | 10895.2                         | 10494.1                         | 9248.8                            | 9327.3                            | 1,2         | 47.37    | 0.02*     |
| Mean Zn (mg/kg)                      | 6604.0                          | 6277.6                          | 4633.4                            | 4076.2                            | 1,2         | 41.74    | 0.01*     |
| Mean Cr (mg/kg)                      | 335.1                           | 353.1                           | 294.0                             | 287.5                             | 1,2         | 31.25    | 0.03*     |
| <b>Above-ground parts</b>            |                                 |                                 |                                   |                                   |             |          |           |
|                                      | <b>Locality 1<br/>(control)</b> | <b>Locality 2<br/>(control)</b> | <b>Locality 3<br/>(bentonite)</b> | <b>Locality 4<br/>(bentonite)</b> | <b>d.f.</b> | <b>F</b> | <b>p</b>  |
| Mean Cu (mg/kg)                      | 51.1                            | 52.2                            | 38.2                              | 37.2                              | 1,2         | 341.64   | 0.003**   |
| Mean Ni (mg/kg)                      | 21.5                            | 23.2                            | 20.0                              | 18.3                              | 1,2         | 7.51     | 0.11      |
| Mean Cd (mg/kg)                      | 1.9                             | 1.9                             | 0.6                               | 0.6                               | 1,2         | 883.61   | 0.001**   |
| Mean Pb (mg/kg)                      | 449.6                           | 445.7                           | 320.9                             | 323.2                             | 1,2         | 2967.9   | <0.001*** |
| Mean Zn (mg/kg)                      | 394.3                           | 395.2                           | 152.5                             | 165.4                             | 1,2         | 1339.2   | <0.001*** |
| Mean Cr (mg/kg)                      | 120.2                           | 121.2                           | 105.6                             | 99.2                              | 1,2         | 31.59    | 0.03*     |
| <b>Roots</b>                         |                                 |                                 |                                   |                                   |             |          |           |
|                                      | <b>Locality 1<br/>(control)</b> | <b>Locality 2<br/>(control)</b> | <b>Locality 3<br/>(bentonite)</b> | <b>Locality 4<br/>(bentonite)</b> | <b>d.f.</b> | <b>F</b> | <b>p</b>  |
| Mean Cu (mg/kg)                      | 232.5                           | 222.5                           | 276.7                             | 273.2                             | 1,2         | 80.74    | 0.01*     |
| Mean Ni (mg/kg)                      | 49.6                            | 41.4                            | 50.2                              | 51.3                              | 1,2         | 1.65     | 0.33      |
| Mean Cd (mg/kg)                      | 4.9                             | 4.9                             | 6.5                               | 6.5                               | 1,2         | 1257.5   | <0.001*** |
| Mean Pb (mg/kg)                      | 2333.2                          | 2755.6                          | 3461.5                            | 3451.2                            | 1,2         | 16600    | 0.049*    |
| Mean Zn (mg/kg)                      | 1186.6                          | 1211.6                          | 1217.1                            | 1245.2                            | 1,2         | 956.65   | 0.23      |
| Mean Cr (mg/kg)                      | 130.9                           | 147.7                           | 223.9                             | 232.2                             | 1,2         | 761.22   | 0.01*     |

\* statistically significant difference at 0.05 significance level, \*\* statistically significant difference at 0.01 significance level, \*\*\* statistically significant difference at 0.001 significance level; d.f. = degrees of freedom (in ANOVA analysis)
